# Supplementary material
Source: publisher figshare collection journal article supplement (https://asha.figshare.com/articles/dataset/_/12978197)
Supplement: Supplementary file 1 [file 2]

**Supplemental Material S5.** The three-way cross tabulation for the intensity level of the signal, the child response behavior, and the observer's confidence in the judgement is shown for the variable-level data.

|                                 | Signal Intensity at or Above Threshold |           | Signal Level Below Threshold |           |
|---------------------------------|----------------------------------------|-----------|------------------------------|-----------|
|                                 | Not Confident                          | Confident | Not Confident                | Confident |
| <b>Full Play-based Response</b> | 11                                     | 552       | 2                            | 41        |
| <b>Subtle Behavior</b>          | 88                                     | 15        | 214                          | 11        |
