# Supplementary material
Source: publisher figshare collection journal article supplement (https://asha.figshare.com/articles/dataset/_/12978197)
Supplement: Supplementary file 2 [file 2]

**Supplemental Material S1.** Age and number of trials completed in each condition are provided for individual children. The total number of trials completed by a child is shown in parentheses, and the number outside the parentheses indicates the number of trials that were included in the analyses. Excluded trials were due to equipment malfunction or missing offline coding data.

| <b>Subject Number</b> | <b>Age (years)</b> | <b>Number of Trials for Fixed-Level Testing</b> | <b>Number of Trials for Variable-Level Testing</b> |
|-----------------------|--------------------|-------------------------------------------------|----------------------------------------------------|
| 91                    | 2.06               | --                                              | 96 (100)                                           |
| 94                    | 2.20               | --                                              | 94 (100)                                           |
| 44                    | 2.22               | 100 (100)                                       | --                                                 |
| 107                   | 2.38               | 100 (100)                                       | 110 (110)                                          |
| 100                   | 2.46               | 100 (100)                                       | 100 (100)                                          |
| 27                    | 2.89               | 100 (100)                                       | --                                                 |
| 66                    | 3.04               | 100 (100)                                       | 69 (70)                                            |
| 58                    | 3.17               | 96 (100)                                        | 47 (50)                                            |
| 102                   | 3.34               | 84 (100)                                        | 70 (70)                                            |
| 89                    | 3.44               | 100 (100)                                       | 100 (100)                                          |
| 103                   | 3.73               | 99 (100)                                        | 88 (90)                                            |
| 21                    | 4.03               | 100 (100)                                       | 100 (100)                                          |
| 90                    | 4.03               | 99 (100)                                        | 27 (30)                                            |
| 97                    | 4.21               | 100 (100)                                       | 90 (90)                                            |
| 50                    | 4.24               | 100 (100)                                       | --                                                 |
| 93                    | 4.84               | 100 (100)                                       | 90 (90)                                            |
| 17                    | 4.90               | 100 (100)                                       | --                                                 |
