# Supplementary material
Source: publisher figshare collection journal article supplement (https://asha.figshare.com/articles/dataset/_/12978197)
Supplement: Supplementary file 3 [file 2]

**Supplemental Material S6.** Coefficient estimates and corresponding *p*-values from the Poisson generalized linear model (GLM) are shown. The outcome is the number of trials with the following explanatory variables: intensity level of the signal, the child response behavior, and the observer's confidence in the judgement. An asterisk indicates significance at the .05 level and three asterisks indicate a *p*-value of less than .001.

| Term                                                                                     | Estimate | Standard Error | Statistic | <i>p</i> -value |
|------------------------------------------------------------------------------------------|----------|----------------|-----------|-----------------|
| (Intercept)                                                                              | 5.293    | 0.071          | 74.671    | < .001 ***      |
| Signal Level at or Above Threshold                                                       | -0.899   | 0.132          | -6.82     | < .001 ***      |
| "Confident" Real-time Observer                                                           | -2.991   | 0.324          | -9.228    | < .001 ***      |
| Full Play-based Response                                                                 | -4.6     | 0.711          | -6.473    | < .001 ***      |
| Signal Level Above Threshold × "Confident" Real-time Observer                            | 1.235    | 0.435          | 2.843     | .004 *          |
| Signal Level Above Threshold × Full Play-based Response                                  | 2.508    | 0.786          | 3.192     | .001 *          |
| "Confident" Real-time Observer × Full Play-based Response                                | 5.935    | 0.795          | 7.47      | < .001 ***      |
| Signal Level Above Threshold × "Confident" Real-time Observer × Full Play-based Response | -0.221   | 0.904          | -0.244    | .807            |
