# Supplementary material
Source: publisher figshare collection journal article supplement (https://asha.figshare.com/articles/dataset/_/12978197)

**Supplemental Material S7.** Evaluation of interval bias was completed by fitting psychometric functions (lines) to pooled data (circles) from real-time observers (left panel) or offline observers (right panel) by signal position: interval 1 (red) or interval 2 (blue). Symbol size indicates the number of observations. For comparison, data and fits when both intervals are included are provided in black. The appearance of “finger bias” for the real-time observer data indicates a bias towards interval 2 when guessing.

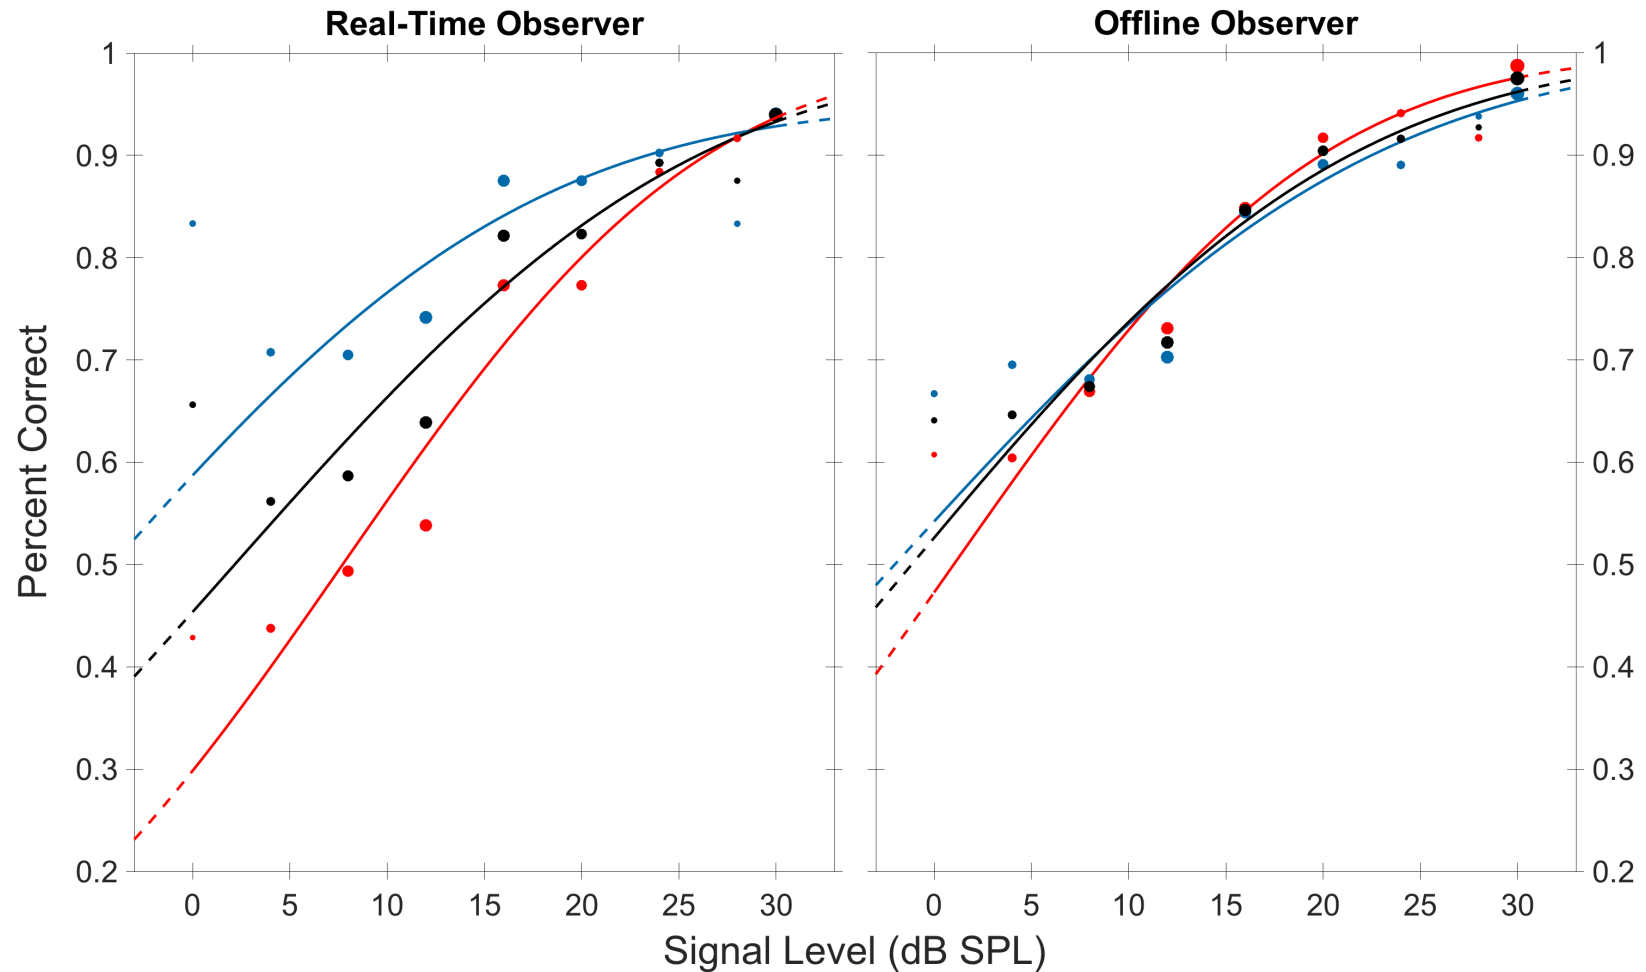

Supplement: Supplementary file 5 [file 2]
